# Supplementary material for: Multifaceted effects of soluble human CD6 in experimental cancer models
Source: PubMed Central journal article supplement — J Immunother Cancer. 2020 Mar 26;8(1):e000172. doi: 10.1136/jitc-2019-000172 (PMC7174071; doi:10.1136/jitc-2019-000172), 2020-03-26
Supplement: jitc-2019-000172supp001.pdf [file jitc-2019-000172supp001.pdf]

## 1 **Supplementary Materials and Methods**

2

### 3 **Animals**

4 Wild-type C57BL/6N mice were purchased from Charles River Laboratories. CD6-  
5 deficient ( $cd6^{-/-}$ ) mice were generated in C57BL/6N background as reported elsewhere  
6 [1]. NSG (NOD *scid* gamma) mice were originally purchased from the Jackson  
7 Laboratory (Bar Harbor, ME). Animals were kept under specific pathogen-free (SPF)  
8 conditions (with the exception of those for the EAE and CIA models, which were  
9 maintained under conventional housing conditions), and used at 7-8 weeks of age. The  
10 experimental protocols used were approved by the Ethics Committee for Animal  
11 Research of the University of Barcelona and all efforts were made to minimize animal  
12 suffering.

13

### 14 ***In vivo* tumor growth assays**

15 Assessment of syngeneic B16.F0 tumor cell growth was performed as reported elsewhere  
16 [2]. Briefly, B16.F0 tumor cells ( $5 \times 10^4$ ) were injected *s.c.* on the mid-dorsum of  $cd6^{-/-}$   
17 and WT ( $cd6^{+/+}$ ) mice with a 23-gauge needle. For xenograft tumor growth, human  
18 melanoma A375 cells ( $1 \times 10^6$ ), kindly provided by Dr. Anna Macià (Institut de Recerca  
19 Biomèdica de Lleida, Spain), were injected *s.c.* in NSG mice and randomly assigned to  
20 treatment groups. Treatments were started two days after tumor challenged and continued  
21 for 3 weeks. Tumors were measured every other day with a Vernier caliper, and their  
22 diameter ( $\emptyset$ ) or area measured in mm. At the end of the follow-up period tumors were  
23 excised and weighed (gr).

24

**25 Liver Melanoma Metastasis assays**

26 Liver metastasis formation was studied as previously described, with minor modifications  
27 [3]. Briefly, C57BL/6J mice receiving different *i.v.* AAV-smCD6 or AAV-Luc  
28 *v.g./mouse* doses were challenged 2 weeks later with intrasplenic injection of B16.F0  
29 cells ( $2.5 \times 10^5$ ). The number of liver metastasis, as well as liver and spleen weight were  
30 determined 3 weeks after challenge.

31

**32 Statistical analyses**

33 Results are given as mean  $\pm$  SEM. Statistical analysis and data representation were  
34 performed with GraphPad Prism 6 Software. Statistical significance was set at  $p \leq 0.05$ .

35

**36 Experimental autoimmune encephalomyelitis (EAE) model**

37 Induction of EAE was performed as previously reported [4]. Briefly, female C57BL/6  
38 mice (8–10 week old) were administered once *s.c.* with 0.25  $\mu\text{g}/\mu\text{L}$  MOG35-55 (ref.  
39 EPK1, ESPIKEM) peptide in a final volume of 200  $\mu\text{L}$  emulsified in CFA. At the time of  
40 immunization and 48 h later, 200 ng of *Bordetella pertusis* toxin (Sigma Aldrich) was  
41 injected *i.p.*. Clinical score was determined daily for 30 days and it represents the average  
42 value for each mice, where 0 = no disease; 0.5 = partially motionless tail; 1 = motionless  
43 tail; 2 = ataxia; 3 = loss of mobility in one limb; 4 = loss of mobility in back limbs; 5 =  
44 moribund; 6 = death.

45

**46 Collagen-Induced Arthritis (CIA) model**

47 Following a previously reported procedure [5], chicken collagen type II (CII; Chondrex)  
48 was dissolved at a concentration of 2 mg/mL in 50 mM acetic acid and emulsified with  
49 CFA containing 4 mg/mL of *Mycobacterium tuberculosis* (Chondrex). For the induction  
50 of CIA, male mice 8-12 weeks old were immunized once with 150 µg chicken CII in a  
51 final volume of 150 µL. The clinical score was assessed weekly with the following  
52 graded scale: 0 = no inflammation; 1 = detectable local swelling/erythema; 2 = swelling  
53 in >1 joint plus pronounced inflammation; 3 = swelling of the entire paw and/or  
54 ankylosis. Each paw was graded and scores added up (maximum score per mouse = 12).

55

56

## 57 **Supplementary References**

58

- 59 1. Orta-Mascaró M, Consuegra-Fernández M, Carreras E, Roncagalli R, Carreras-  
60 Sureda A, Alvarez P, Girard L, Simões I, Martínez-Florensa M, Aranda F, Merino  
61 R, Martínez V-GG, Vicente R, Merino J, Sarukhan A, Malissen M, Malissen B,  
62 Lozano F. CD6 modulates thymocyte selection and peripheral T cell homeostasis.  
63 J Exp Med 2016; 213: 1387-97.
- 64 2. Simões IT, Aranda F, Carreras E, Velasco-de Andrés M, Casadó-Llombart S,  
65 Martínez VG, Lozano F. Immunomodulatory effects of soluble CD5 on  
66 experimental tumor models. Oncotarget 2017; 8: 108156-69.
- 67 3. Long L, Rubin R, Brodt P. Enhanced invasion and liver colonization by lung  
68 carcinoma cells overexpressing the type 1 insulin-like growth factor receptor. Exp  
69 Cell Res 1998; 238: 116–21.

- 70 4. Vasquez M, Consuegra-Fernández M, Aranda F, Jimenez A, Tenesaca S,  
71 Fernandez-Sendin M, Gomar C, Ardaiz N, Di Trani CA, Casares N, Lasarte JJ,  
72 Lozano F, Berraondo P. Treatment of Experimental Autoimmune  
73 Encephalomyelitis by Sustained Delivery of Low-Dose IFN- $\alpha$ . *J Immunol* 2019;  
74 203: 696–704.
- 75 5. Postigo J, Genre F, Iglesias M, Fernández-Rey M, Buelta L, Carlos Rodríguez-  
76 Rey J, Merino J, Merino R. Exacerbation of type II collagen-induced arthritis in  
77 apolipoprotein E-deficient mice in association with the expansion of Th1 and  
78 Th17 cells. *Arthritis Rheum* 2011; 63: 971–80.



79 **Supplementary Figures**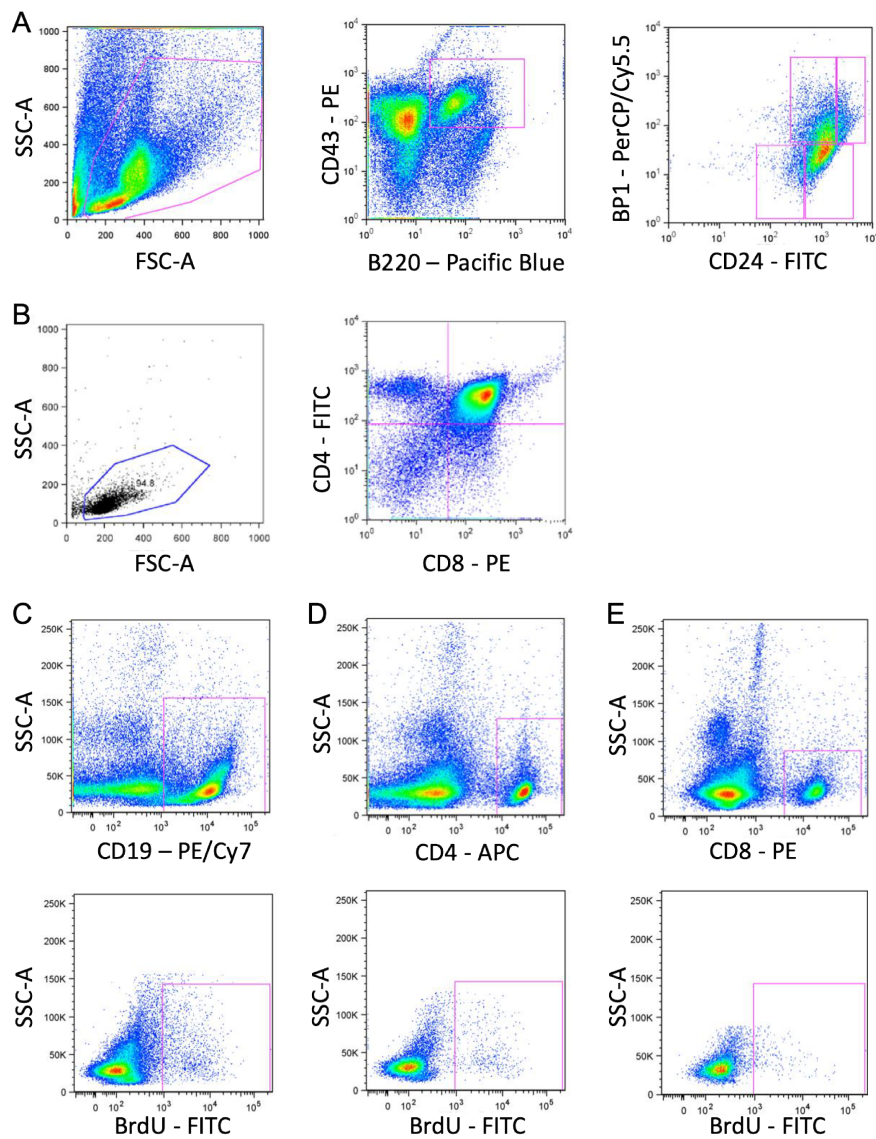

80

81 **Fig. S1. Dot plots showing the gating strategy used in the analysis of lymphocyte**  
 82 **subpopulations from primary and secondary mouse lymphoid organs. A) Gating**  
 83 **strategy followed in the identification of bone marrow Pre-Pro B ( $CD24^{low}BP1^{-}$ ), early**  
 84 **Pro B ( $CD24^{+}BP1^{-}$ ), late Pro B ( $CD24^{+}BP1^{+}$ ) and Pre B ( $CD24^{high}BP1^{+}$ ) cells. B) Gating**

5

85 strategy followed in the identification of DN (CD4<sup>-</sup>CD8<sup>-</sup>), DP (CD4<sup>+</sup>CD8<sup>+</sup>), CD4SP  
86 (CD4<sup>+</sup>CD8<sup>-</sup>) and CD8SP (CD4<sup>-</sup>CD8<sup>+</sup>) thymocytes. **C-E**) Gating strategy followed in the  
87 identification of spleen BrdU<sup>+</sup> B (CD19<sup>+</sup>) (**C**), Th (CD4<sup>+</sup>) (**D**), and Tc (CD8<sup>+</sup>) (**E**) cells.

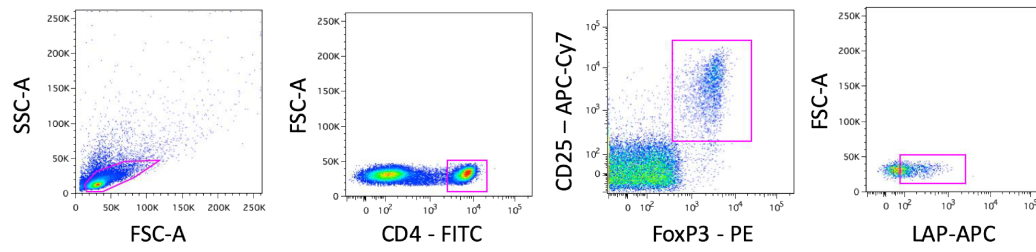

88

89 **Fig. S2. Dot plots showing the gating strategy used in the analysis of functional**  
90 **Tregs.** Gating strategy followed in the identification of spleen LAP<sup>+</sup> Treg  
91 (CD25<sup>+</sup>FoxP3<sup>+</sup>/CD4<sup>+</sup>) cells.

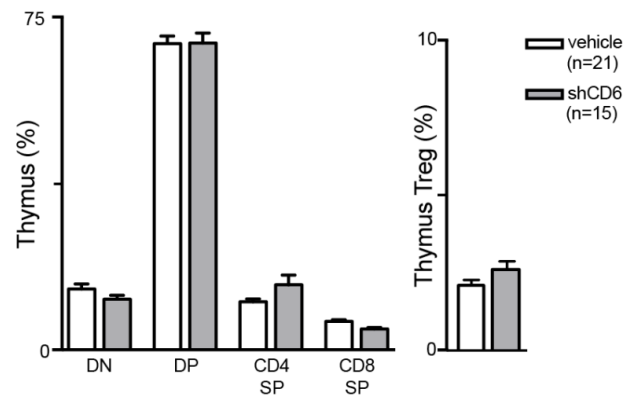

92

93 **Fig. S3. Immunophenotypical analysis of thymus populations from WT mice treated**  
94 **with exogenous shCD6.** Percentage of thymus DN, DP, CD4<sup>+</sup>SP, CD8<sup>+</sup>SP (**left**), and  
95 CD25<sup>+</sup>FoxP3<sup>+</sup> in CD4<sup>+</sup>T cells (Treg) (**right**) from C57BL/6N mice treated every 48 h for  
96 14 days with 1.25 mg/kg of shCD6 or vehicle (PBS 10 % glycerol). Two-tailed Student's  
97 t-test was applied.

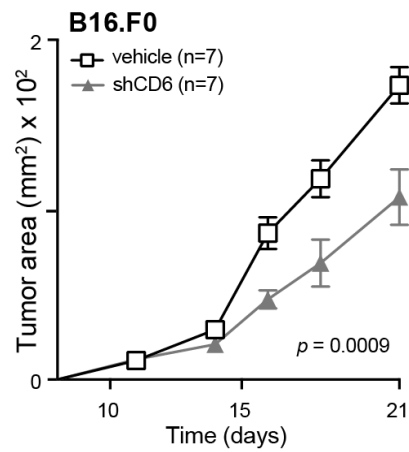

98

99 **Fig. S4. Growth curves of s.c. implanted syngeneic melanoma cells into WT mice**

100 **therapeutically infused with shCD6 protein.** B16.F0 ( $5 \times 10^4$ ) cells were injected s.c.

101 into WT mice and then shCD6 (1.25 mg/Kg) or vehicle (PBS 10% glycerol) were

102 therapeutically administered every 48 h starting when tumor size was approx.  $5\text{-}9 \text{ mm}^2$

103 ( $\sim$ day 9 post implantation). Tumor growth (area in  $\text{mm}^2$ ) was monitored until sacrifice.

104 Data are presented as mean  $\pm$  SEM and two-way ANOVA test was used for statistical

105 analysis.

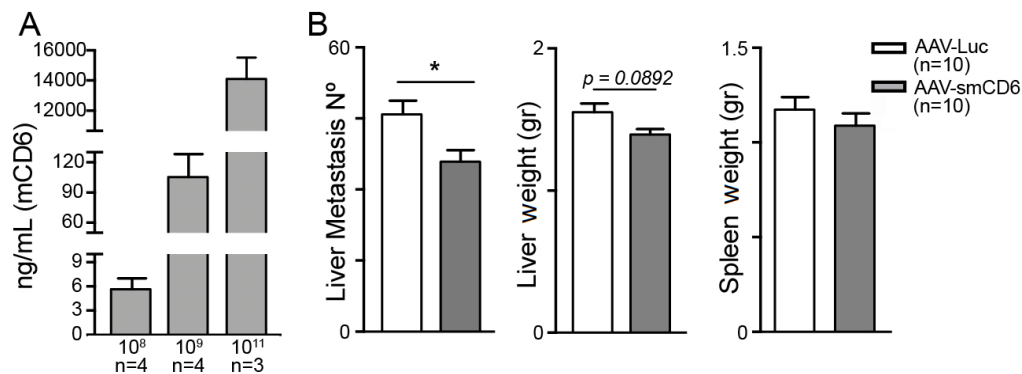

106

107 **Fig. S5. Dose-course and metastatization assays in WT mice transduced with AAV-**108 **smCD6. A)** C57BL/6J mice receiving different *i.v.* AAV-smCD6 v.g./mouse doses ( $10^8$ ,109  $10^9$ , and  $10^{11}$ ) were bled 2 weeks later for plasma smCD6 levels determination by ELISA.110 Data are expressed as mean  $\pm$  SEM. **B)** C57BL/6J mice (n = 10/group) transduced *i.v.*111 with  $10^{11}$  AAV-smCD6 or AAV-Luc v.g./mouse were challenged 2 weeks later with112 B16.F0 ( $2.5 \times 10^5$ ) cells injected in the spleen. The number of liver metastasis and liver

113 weight (gr) 3 weeks after challenge is represented. Spleen weight (primary tumor) is also

114 represented. Data represent cumulative results from two independent experiments

115 expressed as mean  $\pm$  SEM. \* p < 0.05; two-tailed Student's t-test.

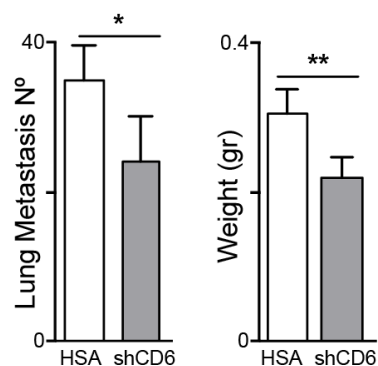

116

117 **Fig. S6. Metastatization assays in WT mice treated with shCD6 protein.** WT  
118 C57BL/6J mice were *i.p.* infused with 1.25 mg/kg of shCD6 or HSA 1 h before and after  
119 *i.v.* (tail vein) challenge with  $2 \times 10^5$  B16.F0 cells (in 200  $\mu$ L) previously incubated for 15  
120 min with saturating amounts of shCD6 (25  $\mu$ g/ $1 \times 10^6$  cells) or HSA. Number of lung  
121 metastasis (**left**) and lung weight (**right**) was determined 3 weeks after challenge. Data  
122 are expressed as mean  $\pm$  SEM. \*  $p < 0.05$ ; \*\*  $p < 0.01$ ; two-tailed Student's t-test.

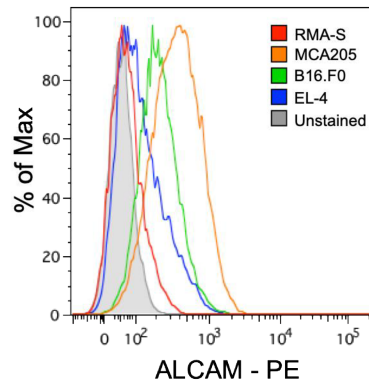

123

124 **Fig. S7. Surface ALCAM/CD166 expression in different mouse tumor cell lines.**

125 FACS analysis of RMA-S, MCA205, B16.F0, and EL-4 tumor cell lines stained for

126 surface ALCAM expression.



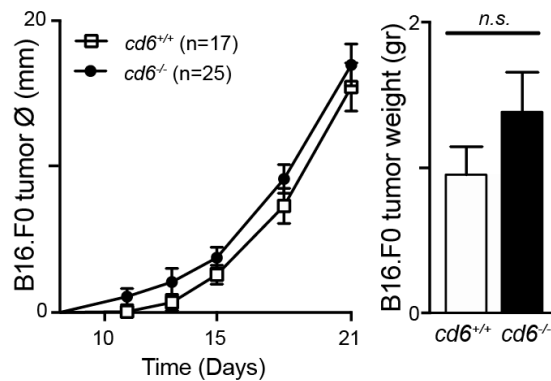

127

128 **Fig. S8. Tumor growth in *cd6*-deficient mice.** B16.F0 ( $5 \times 10^4$ ) cells were injected s.c.  
129 into WT (*cd6*<sup>+/+</sup>) and *cd6*-deficient mice (*cd6*<sup>-/-</sup>). Tumor growth ( $\emptyset$ , diameter in mm) and  
130 weight (gr) were measured every other day (**left**) and at the time of sacrifice (**right**),  
131 respectively. Cumulative data from two different experiments are represented as mean  $\pm$   
132 SEM. Two-way ANOVA and Mann Whitney tests were used for statistical analysis of  
133 tumor growth and weight, respectively.

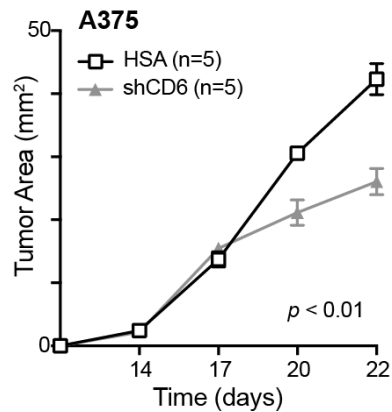

134

135 **Fig. S9. Xenograft tumor growth in NSG mice.** A375 cells ( $1 \times 10^6$ ) were injected *s.c.*  
136 into NSG mice, and tumor growth was measured every other day (area in mm). HSA or  
137 shCD6 (100  $\mu$ g/mouse) were administered *i.p.* (200  $\mu$ L/mouse) every other day starting at  
138 day 2 after tumor challenge and continued for 3 weeks. Two-way ANOVA and Mann  
139 Whitney tests were used for statistical analysis of tumor growth. The results are  
140 represented as mean  $\pm$  SEM.

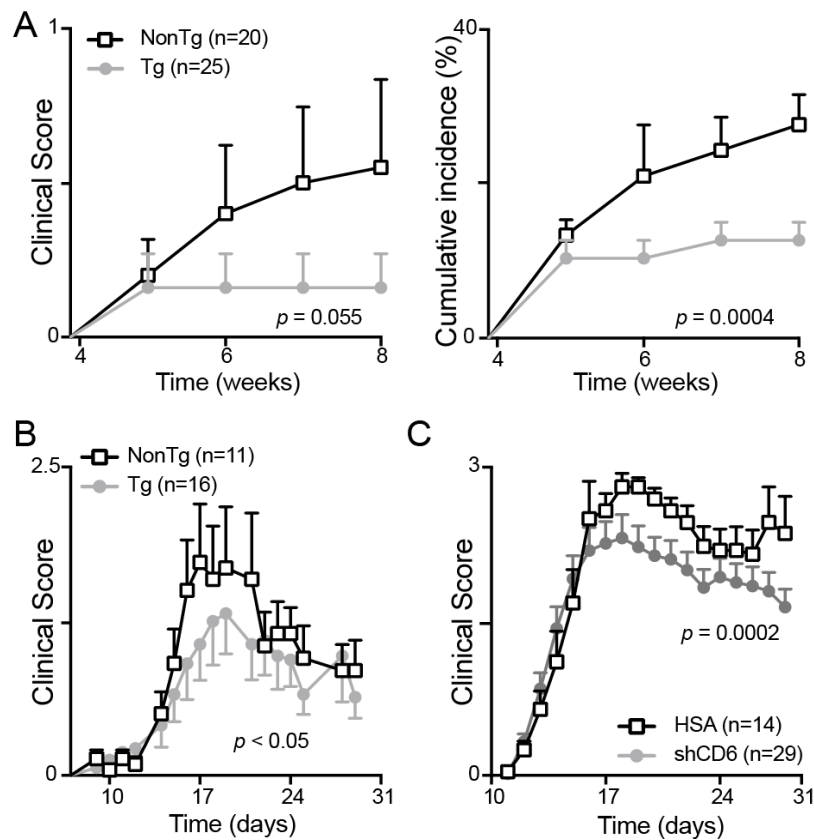

141

142 **Fig. S10. Attenuated autoimmune responses in shCD6LckE $\mu$ Tg and shCD6-treated**143 **WT mice. A) Weekly clinical scores (left) and cumulative incidence percentage (right)**144 **in 7–8 week old male shCD6E $\mu$ LckTg and NonTg mice subjected to CIA. B) Clinical**145 **scores of 8–10 week old female shCD6E $\mu$ LckTg and NonTg mice subjected to EAE.**146 **Graph shows cumulative data from two independent experiments. C) Clinical scores of 8–**147 **week-old WT female mice subjected to EAE and treated *i.p.* with 1.25 mg/kg shCD6 or**148 **HSA (in PBS 10% glycerol) every 48 h, starting from day 0. Cumulative data from two**149 **independent experiments are presented as mean  $\pm$  SEM. Two-way tests were used for**150 **statistical analysis.**

15
